# Supplementary material
Source: PubMed Central journal article supplement (PMC3563835)

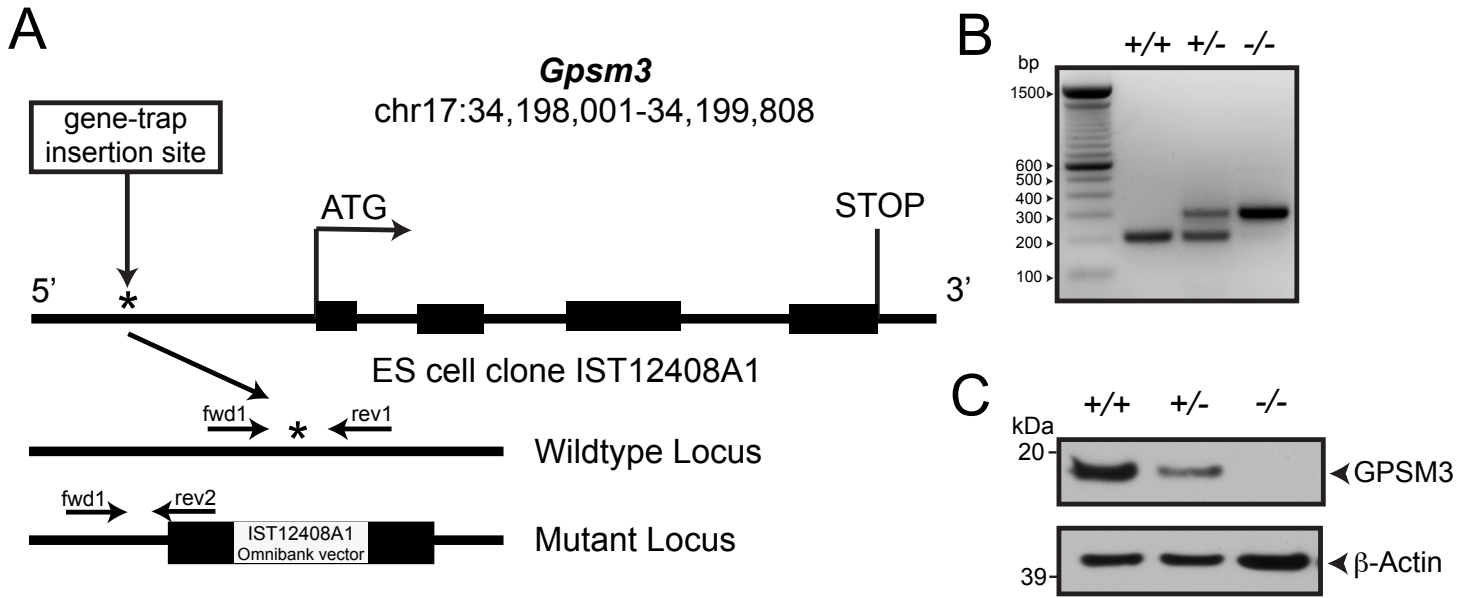

Supplement: NIHMS428082-supplement-01.pdf [file NIHMS428082-supplement-01.pdf]

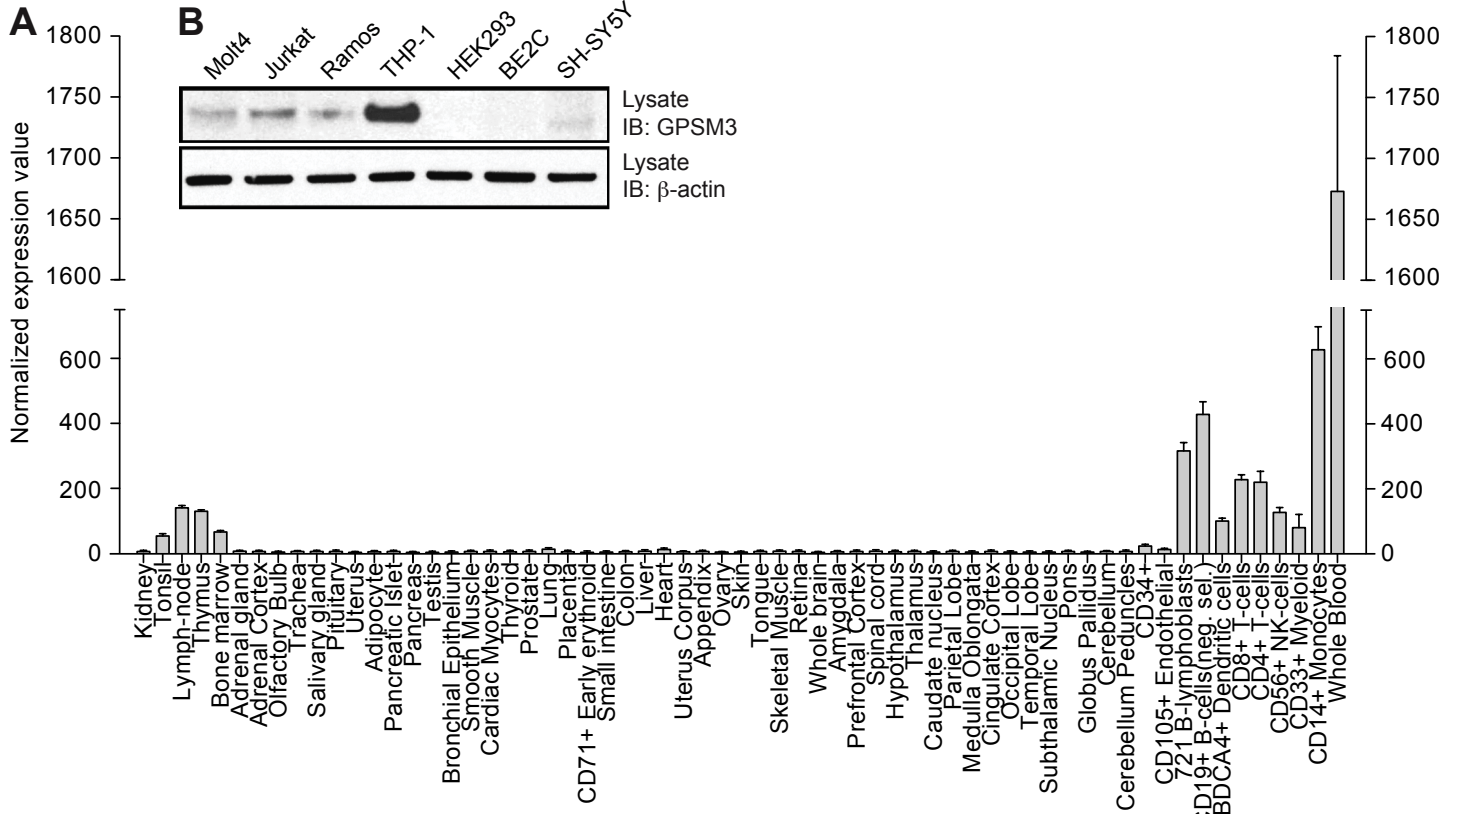

Supplement: NIHMS428082-supplement-03.pdf [file NIHMS428082-supplement-03.pdf]
